# Supplementary material
Source: Research Square preprint supplement (doi:10.21203/rs.3.rs-9990270/v1)
Supplement: Supplementary file 1 [file 96e892f9742da6ad34f387a6.docx]

Table1 Clinical characteristics and outcomes of the study

|  |  | P value |
| --- | --- | --- |
| Number | 46 |  |
| Age (years) | 29.91 ± 5.02 |  |
| BMI (kg/m2) | 20.83 ± 1.89 |  |
| Duration of gender recognition（year) | 13.93 ± 2.26 |  |
| Operating time（MIN） | 101.83 ± 8.03 |  |
| Intraoperative blood loss volume（ML） | 20.86 ± 3.54 |  |
| Complication | 0 |  |
| Patient satisfaction（VAS) | 9.09 ± 0.51 |  |
| Pain scoring（VAS） | 1.17±0.44 |  |
| Shoulder width (preoperative soft tissue)  Shoulder width (postoperative soft tissue) | 39.90 ± 2.43  37.01 ± 2.17 | P<0.001 |
| Scar hyperplasia | 0 |  |

VAS: Visual Analogue Scale.
